# Supplementary figures and images for: Genomic and clinical landscape of metastatic hormone receptors-positive breast cancers carrying ESR1 alterations
Source: PubMed Central journal article supplement — ESMO Open. 2024 Oct 1;9(10):103731. doi: 10.1016/j.esmoop.2024.103731 (PMC11480226; doi:10.1016/j.esmoop.2024.103731), 2024-10-01

### ESR1 wild-type tumors (no. 548)

### ESR1 altered tumors (no. 131)

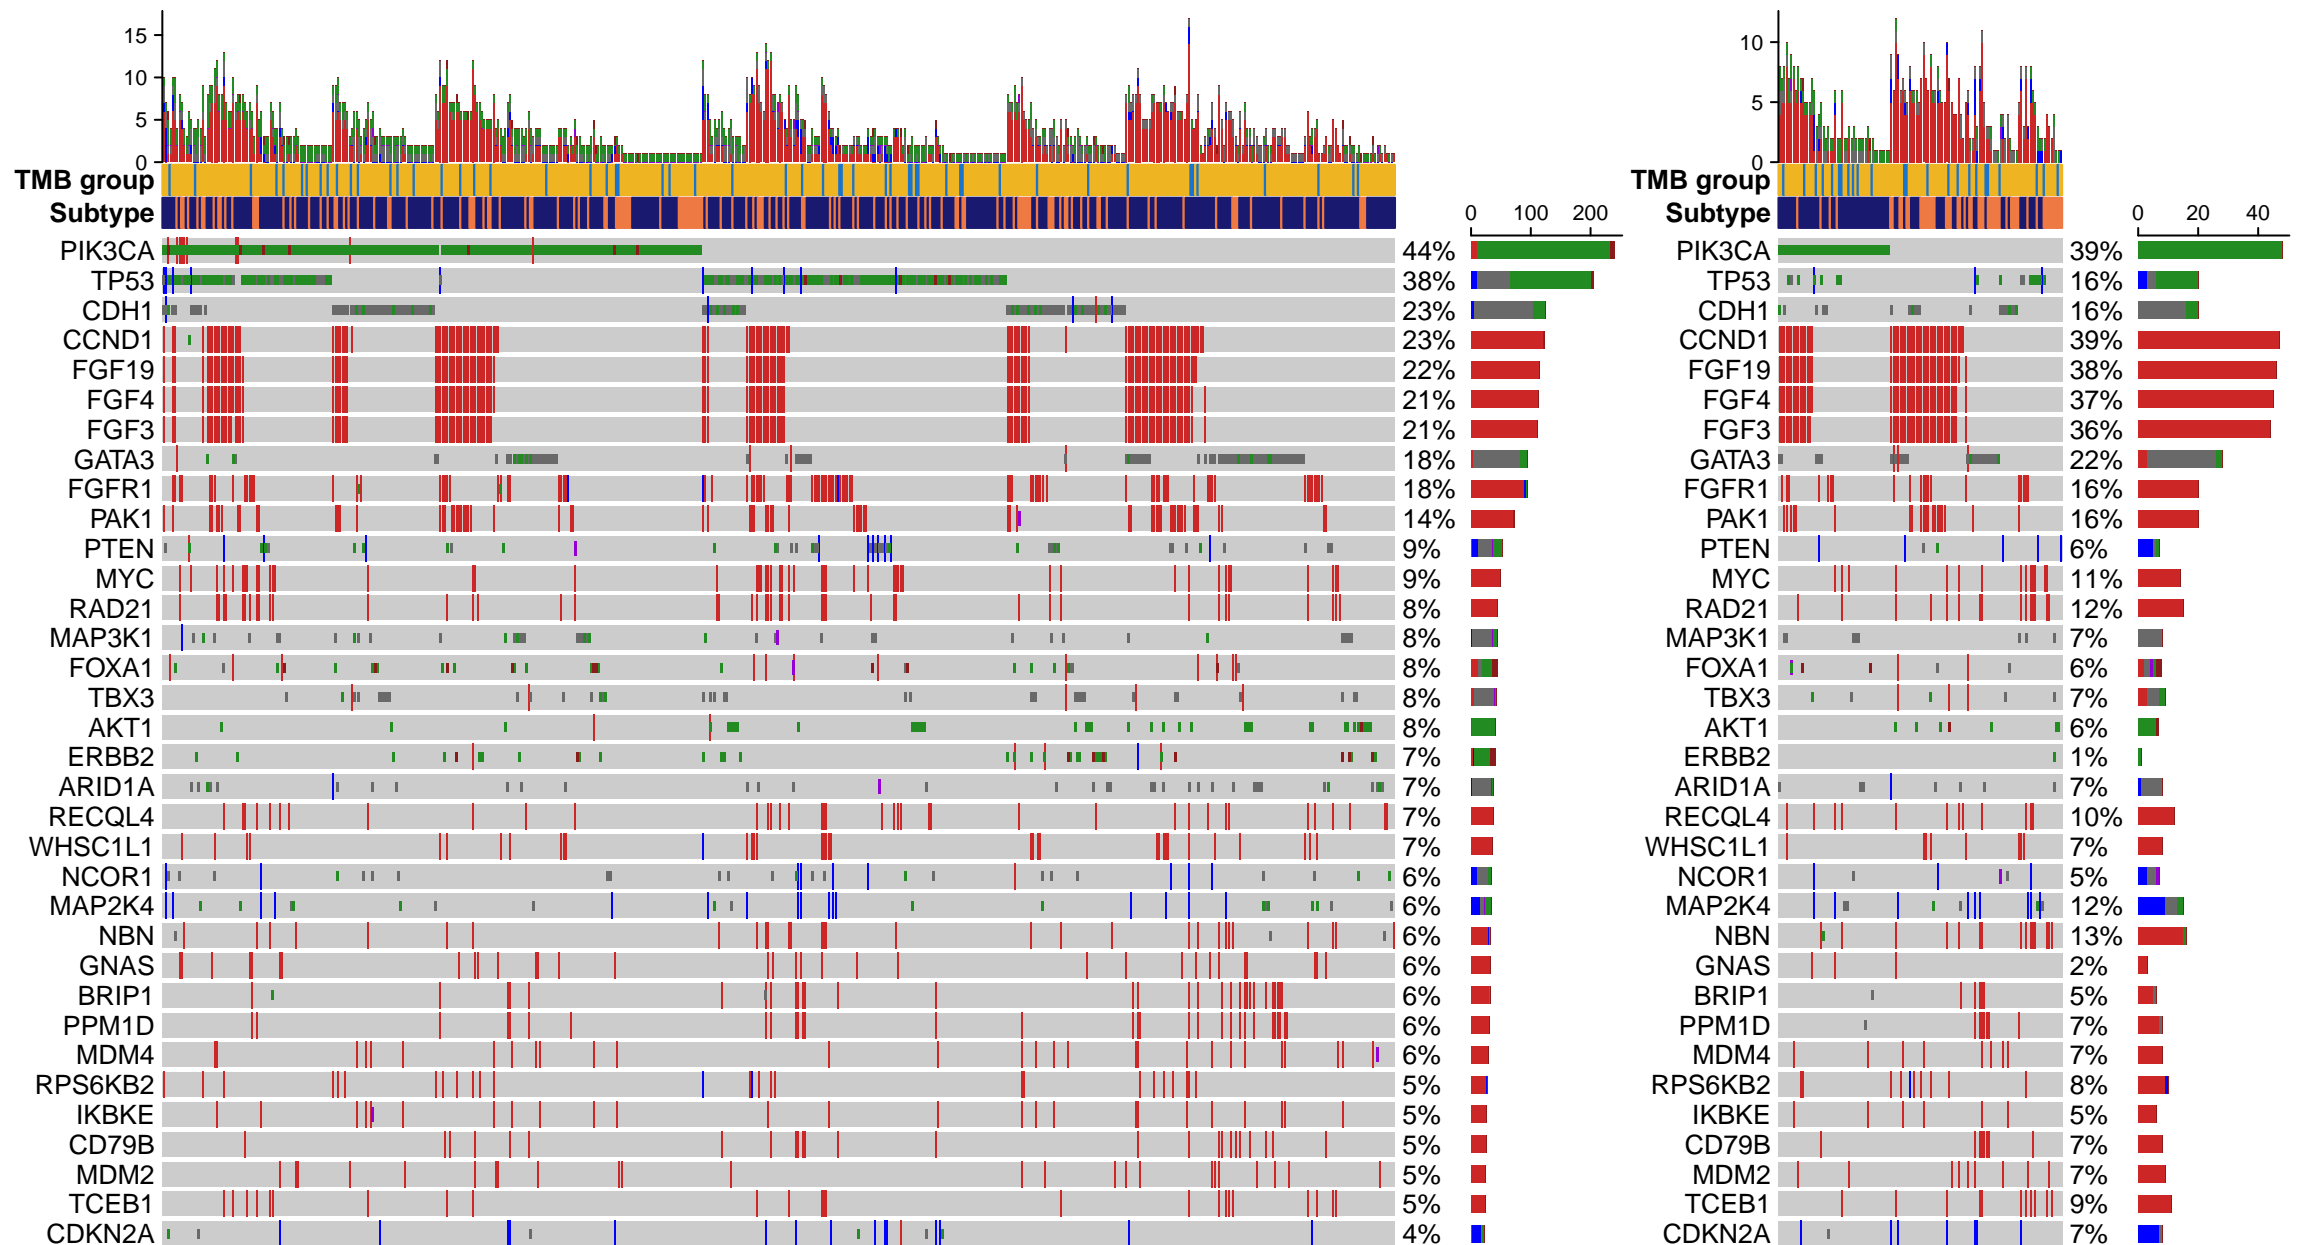

#### Alterations

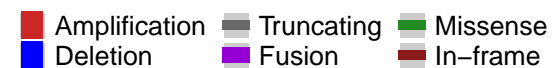

#### Subtype

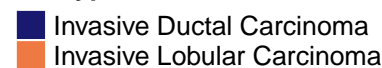

#### TMB category

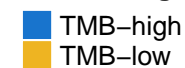

Supplement: mmc1.pdf [file mmc1.pdf]
